# Supplementary material for: Horizontal transfer of exosomal microRNAs transduce apoptotic signals between pancreatic beta-cells
Source: PubMed Central journal article supplement (PMC4371845; doi:10.1186/s12964-015-0097-7), 2015-03-19
Supplement: 12964_2015_97_MOESM4_ESM.pdf [file 12964_2015_97_MOESM4_ESM.pdf]

A

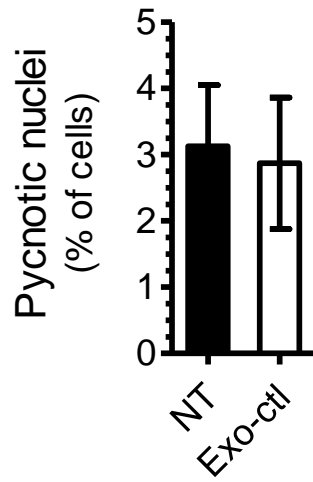

B

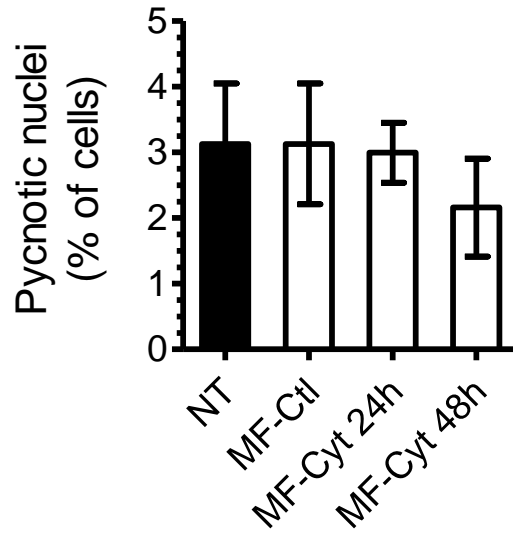

**Figure S3: Exosomes of untreated MIN6B1 cells or media fraction in which exosomes were resuspended do not affect recipient naïve beta-cell survival**
