# Supplementary material for: Horizontal transfer of exosomal microRNAs transduce apoptotic signals between pancreatic beta-cells
Source: PubMed Central journal article supplement (PMC4371845; doi:10.1186/s12964-015-0097-7), 2015-03-19
Supplement: 12964_2015_97_MOESM6_ESM.pdf [file 12964_2015_97_MOESM6_ESM.pdf]

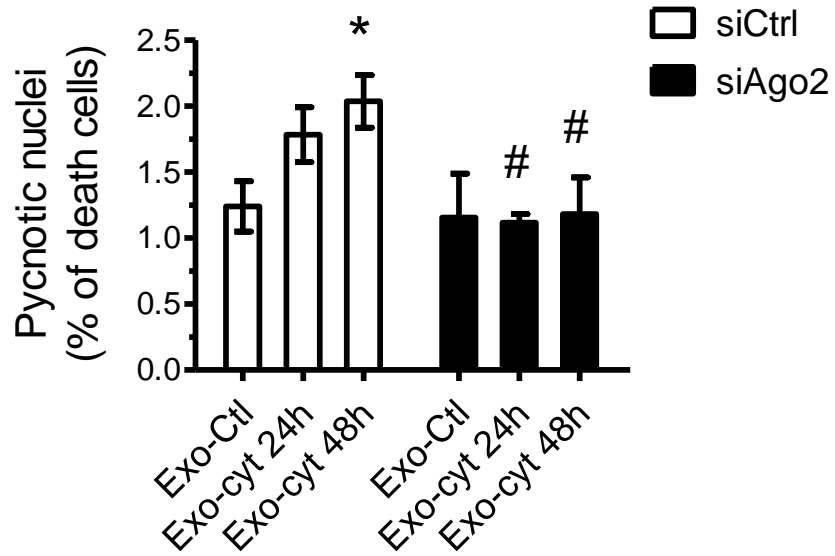

**Figure S5 : Ago2 inactivation in recipient beta-cells prevents apoptosis induced by exosomes of cytokine-treated cells.**
